# Supplementary figures and images for: Multigene phylogeny of the Mustelidae: Resolving relationships, tempo and biogeographic history of a mammalian adaptive radiation
Source: Springer Nature journal article supplement (doi:10.1186/1741-7007-6-10), 2008-02-14

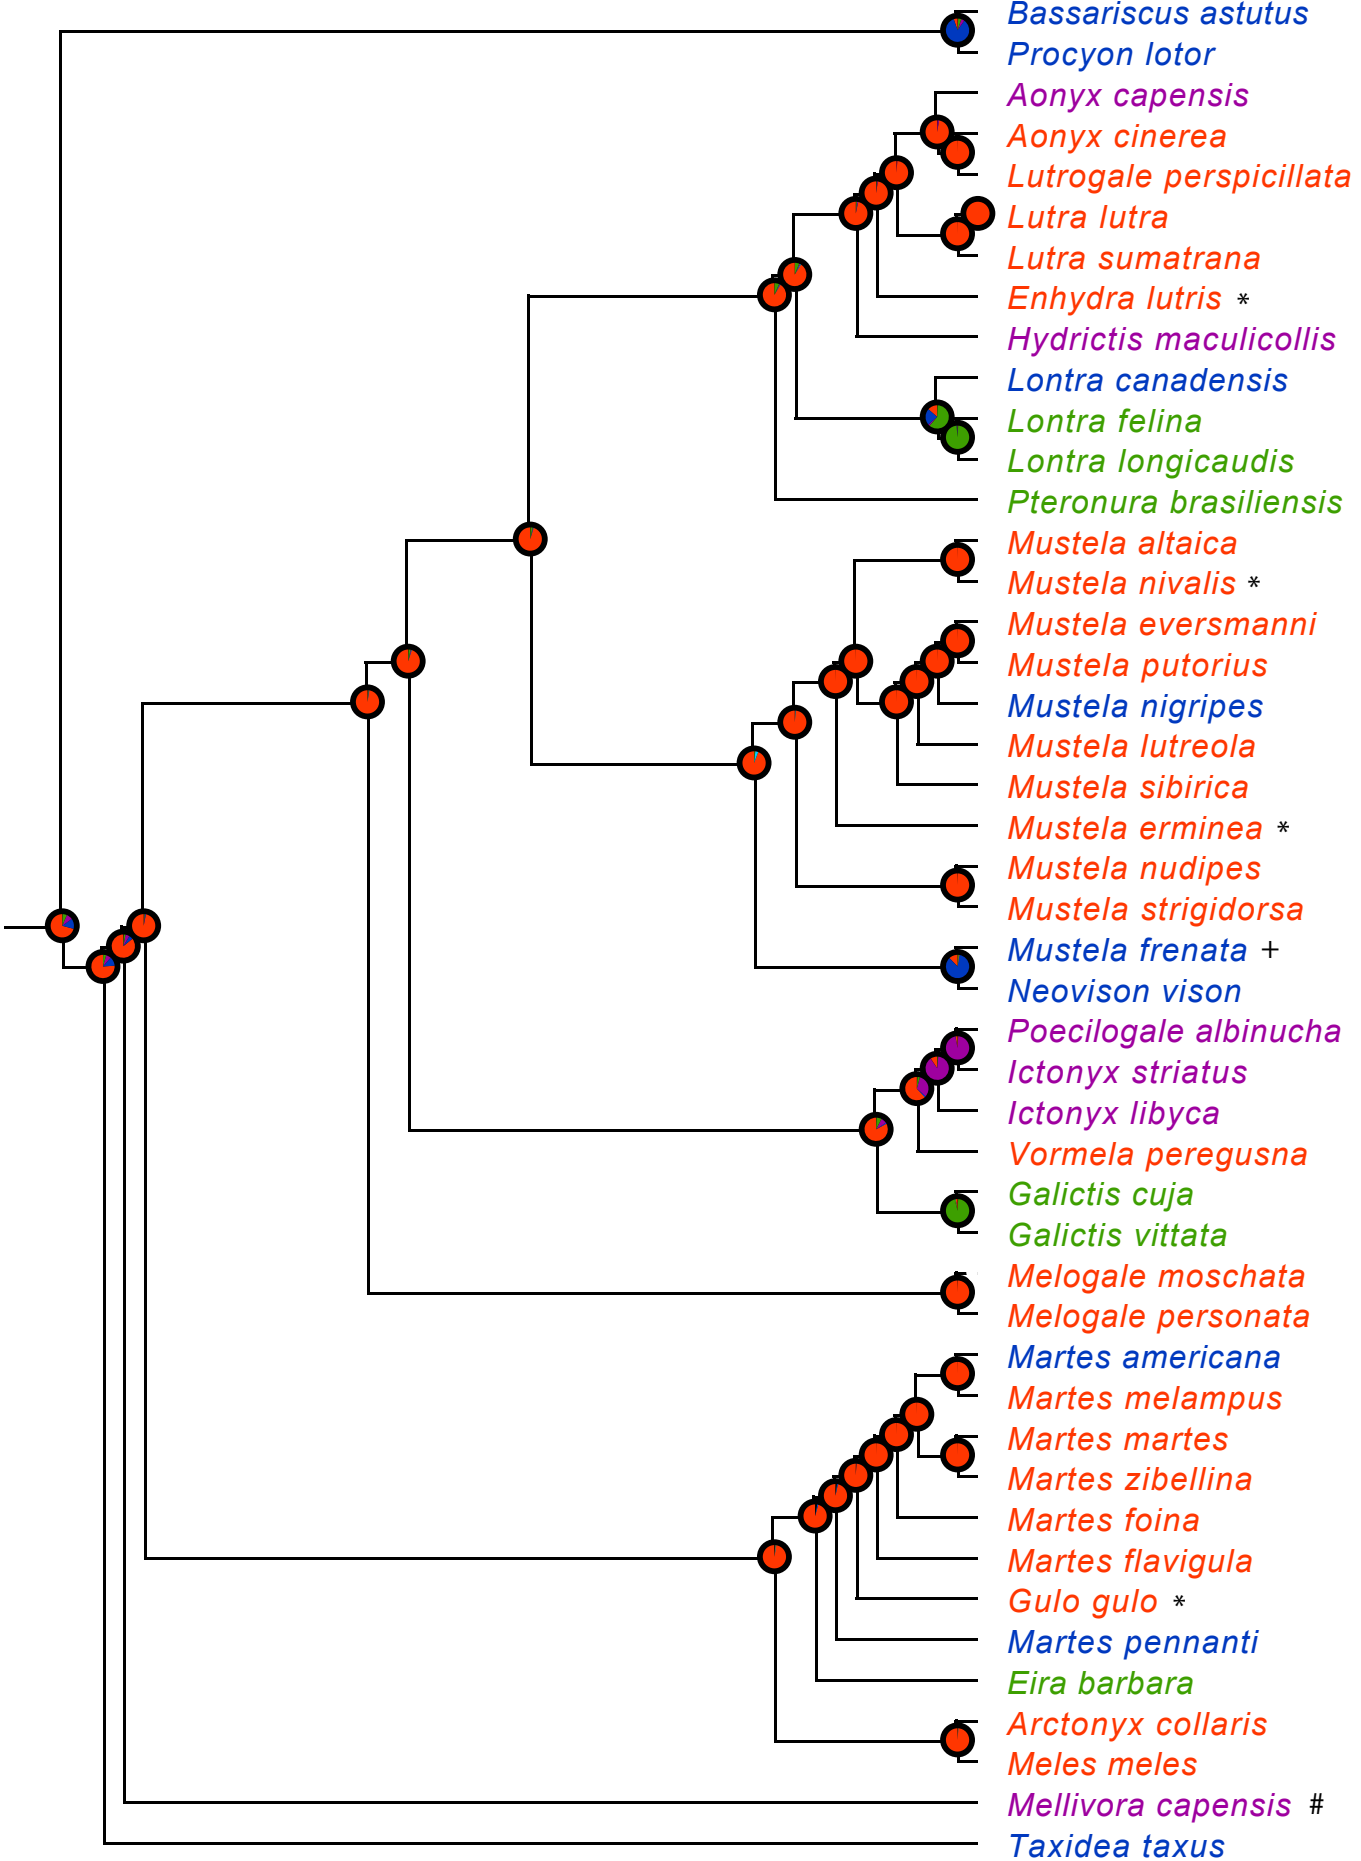

● Africa  
 ● Eurasia  
 ● North America  
 ● South America

Supplement: 12915_2008_163_MOESM10_ESM.pdf [file 12915_2008_163_MOESM10_ESM.pdf]

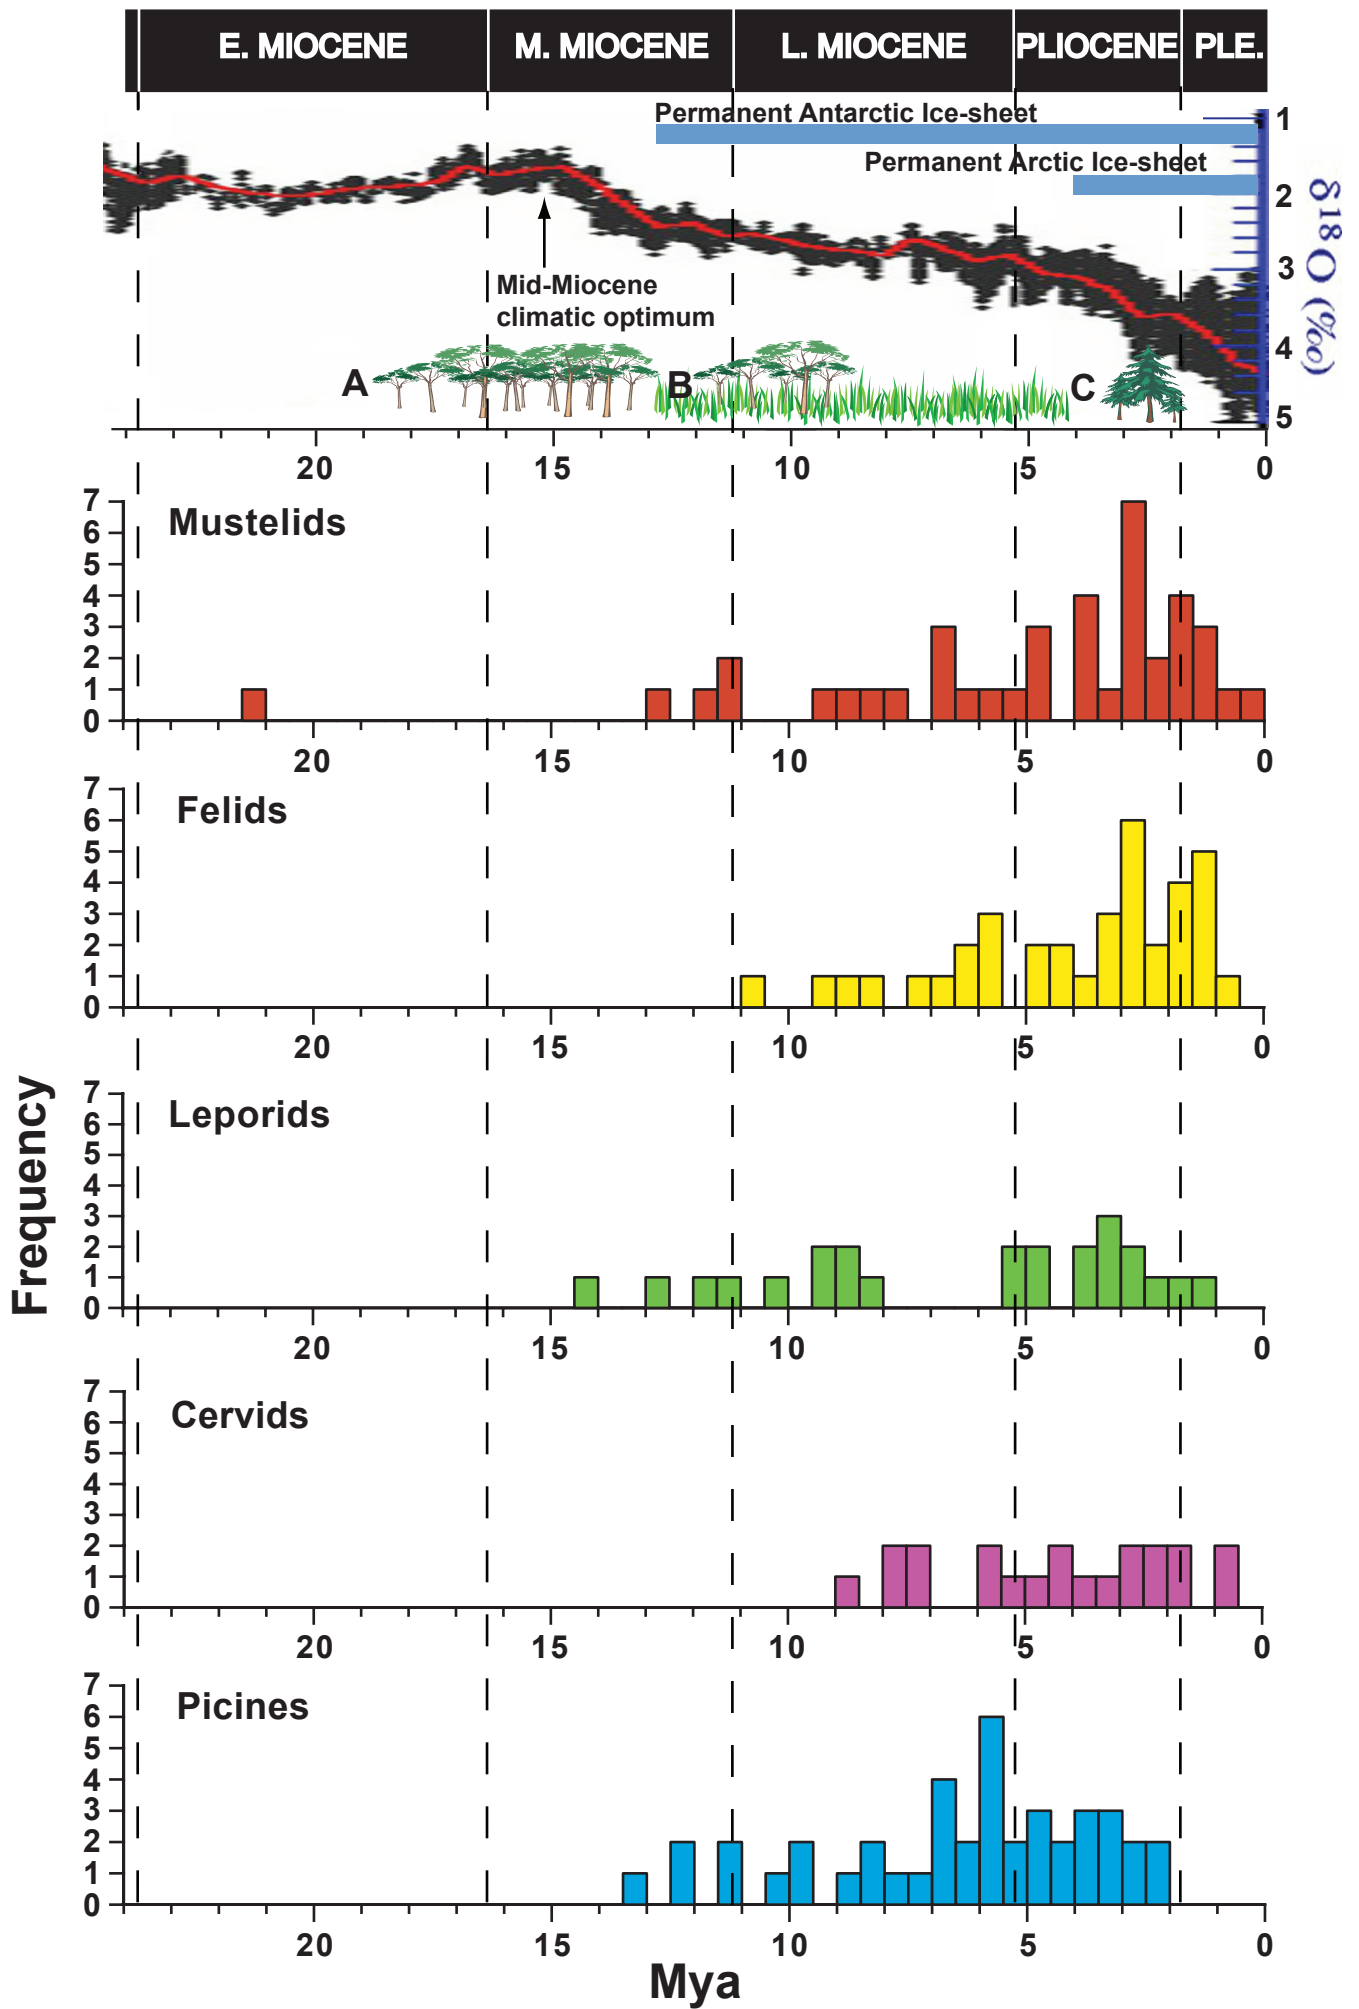

Supplement: 12915_2008_163_MOESM11_ESM.pdf [file 12915_2008_163_MOESM11_ESM.pdf]

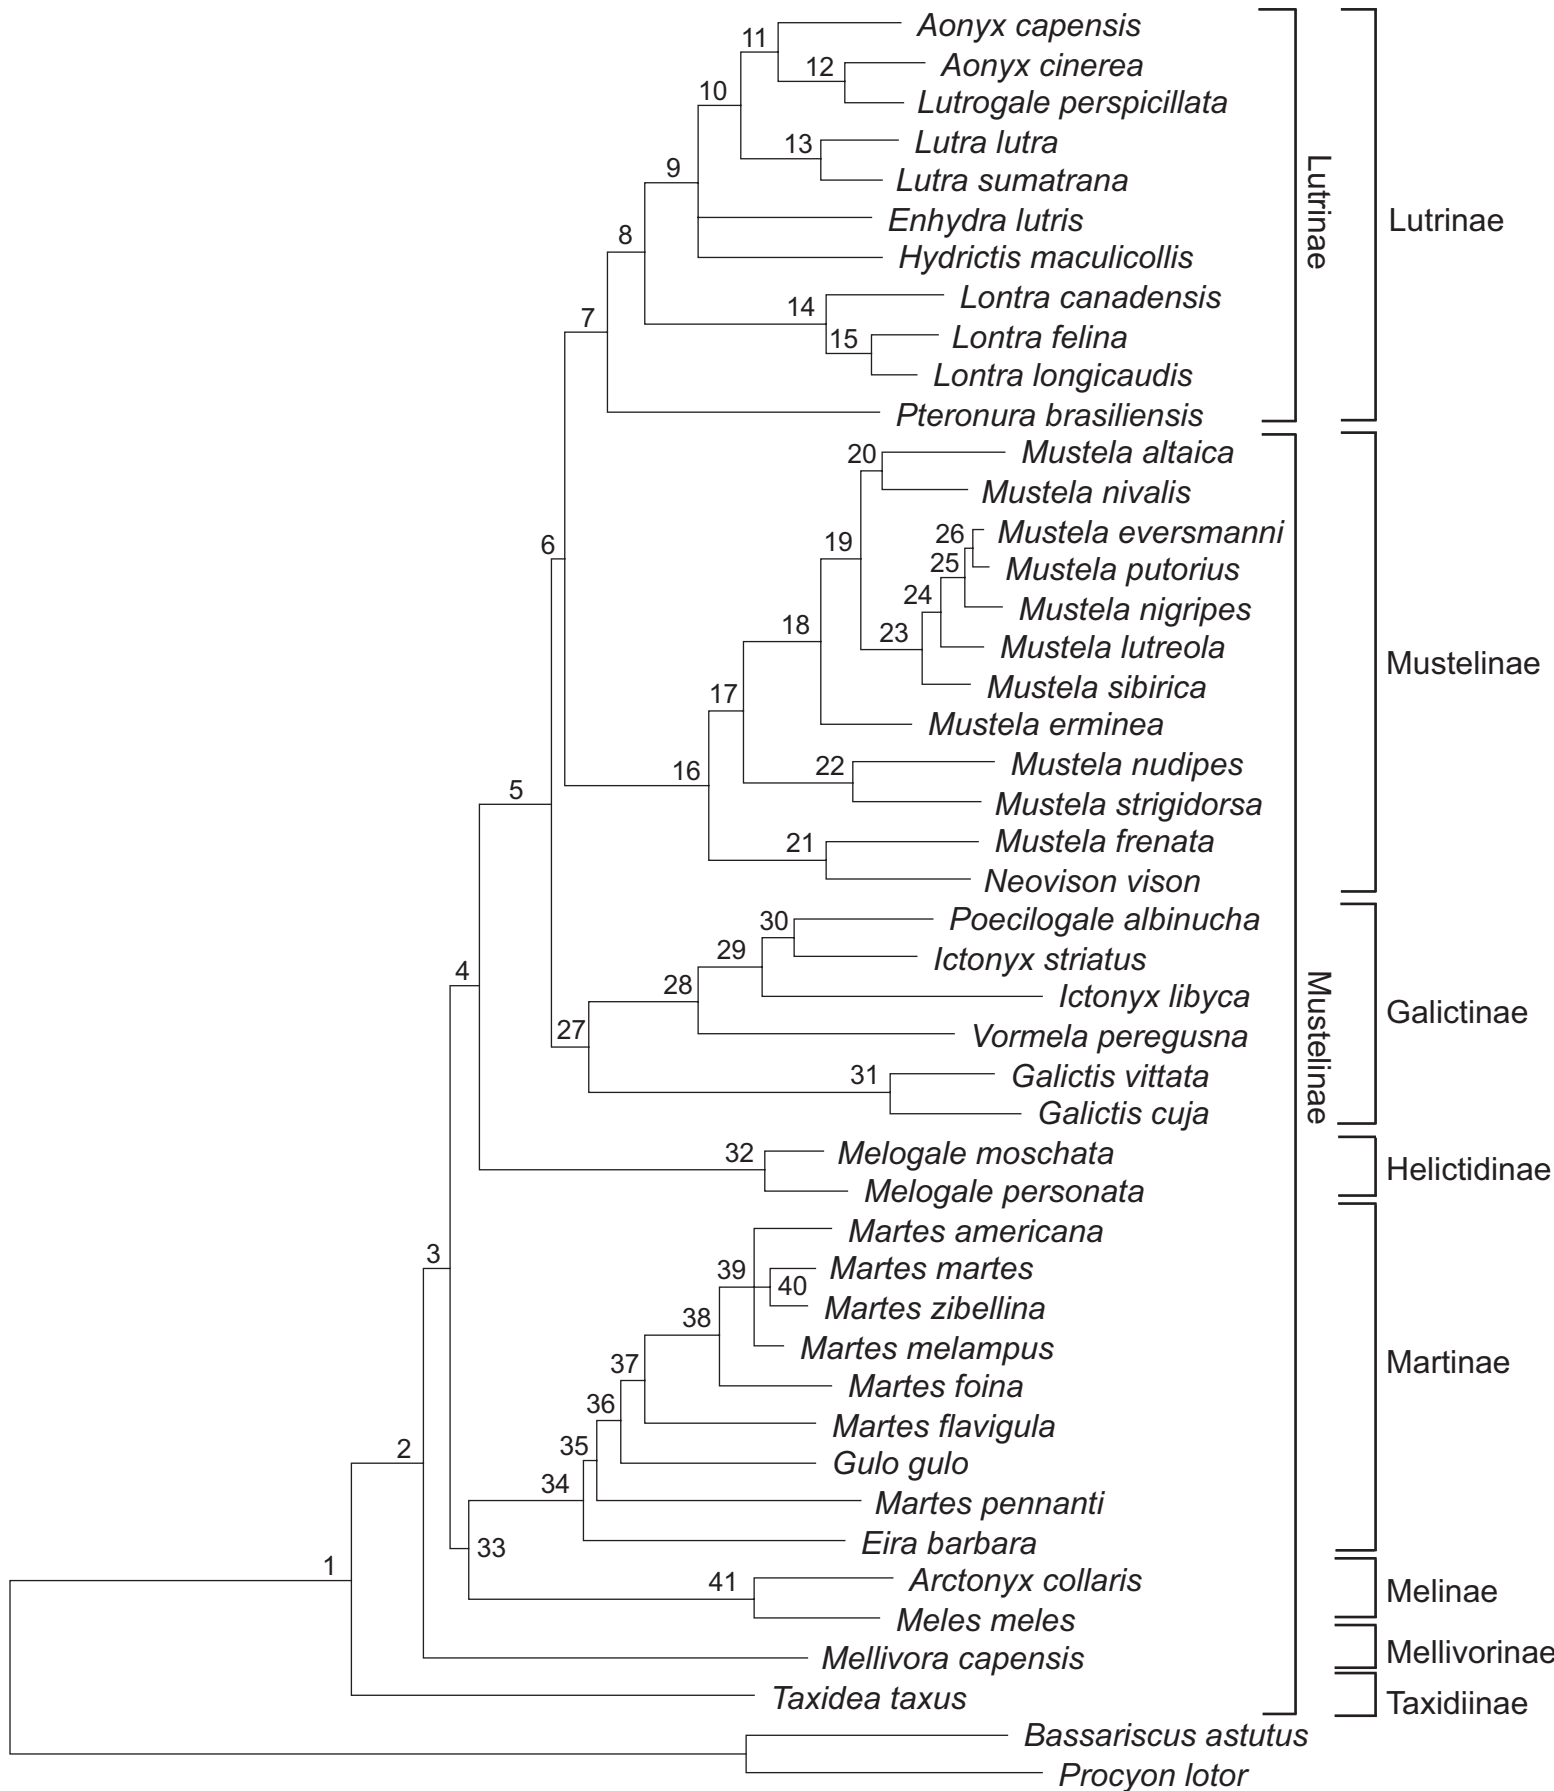

0.005 substitutions/site

Supplement: 12915_2008_163_MOESM7_ESM.pdf [file 12915_2008_163_MOESM7_ESM.pdf]

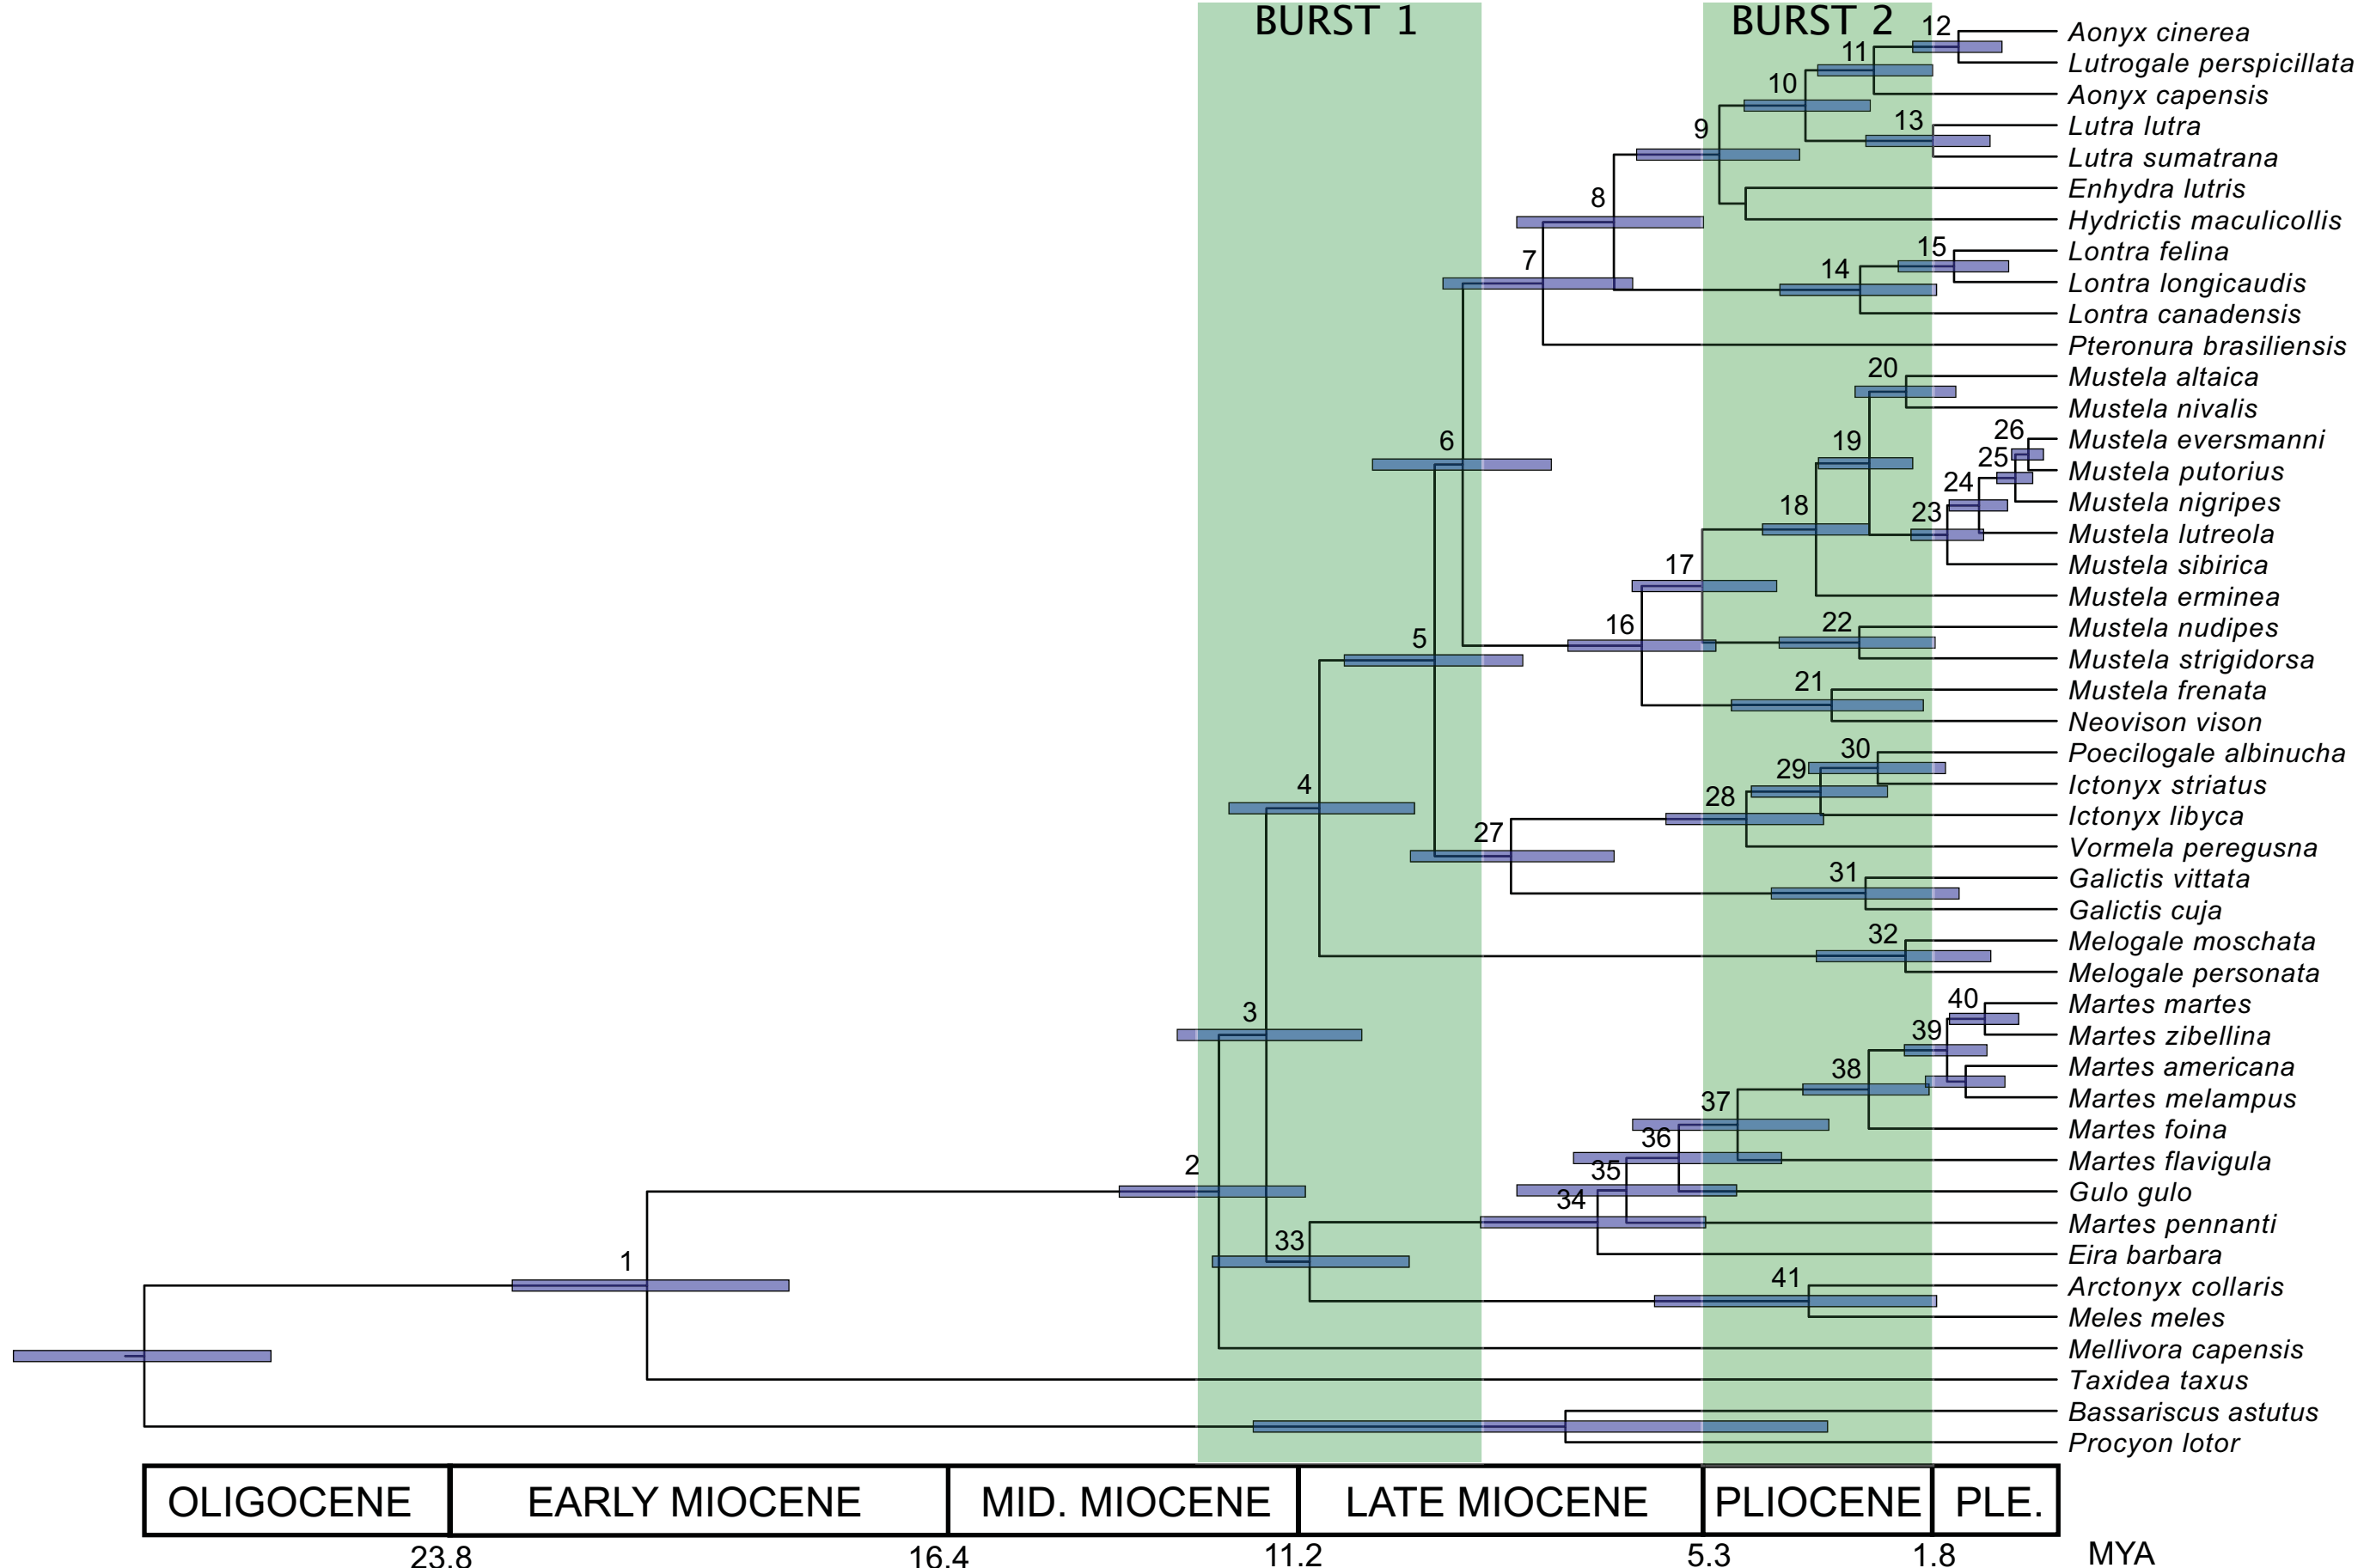

Supplement: 12915_2008_163_MOESM8_ESM.pdf [file 12915_2008_163_MOESM8_ESM.pdf]

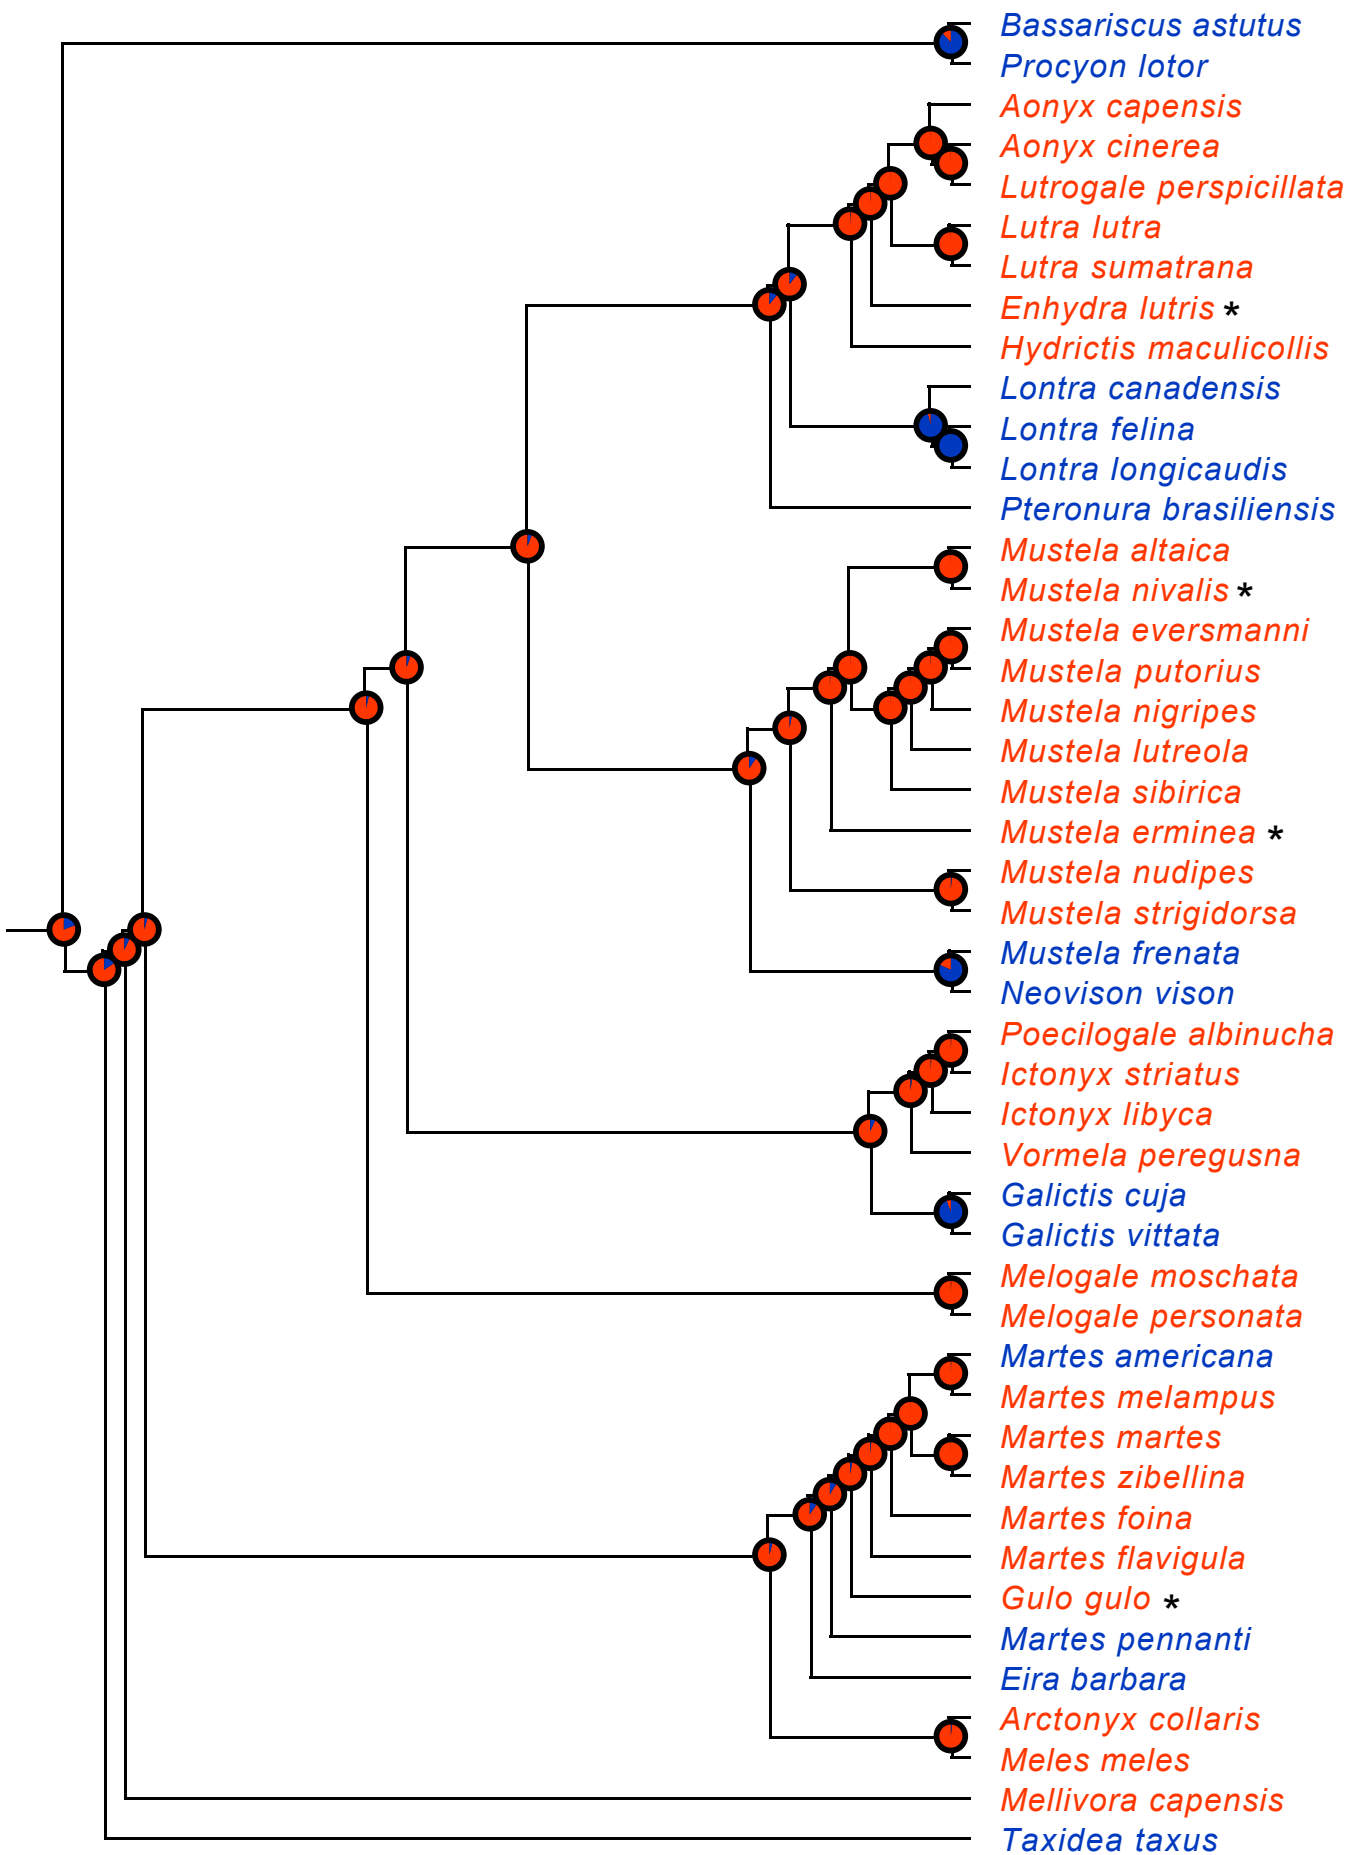

● Old World    ● New World

Supplement: 12915_2008_163_MOESM9_ESM.pdf [file 12915_2008_163_MOESM9_ESM.pdf]
